# Supplementary material for: High-entropy oxychloride increasing the stability of Li–sulfur batteries
Source: Royal Society of Chemistry journal article supplement (doi:10.1039/d3ra01496g), 2023-01-01
Supplement: d3ra01496g1.pdf [file d3ra01496g1.pdf]

## Supplementary info

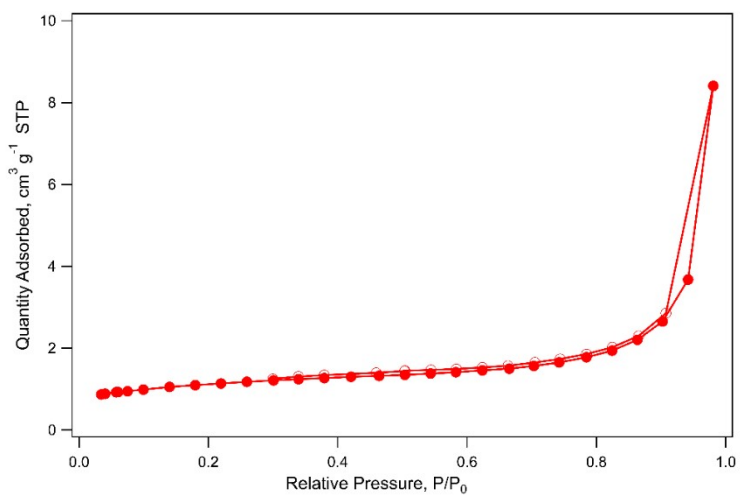

Figure S1 Nitrogen adsorption isotherm of LiHFeOFeCl

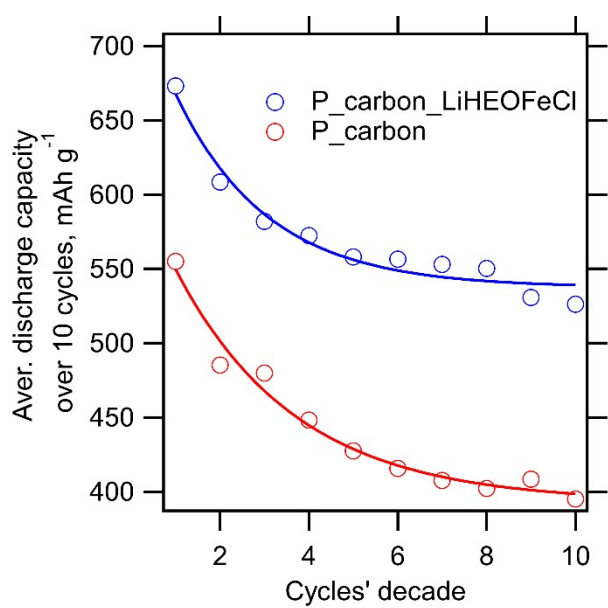

Figure S2 Average capacity calculated for ten subsequent discharge cycles from the date of Fig. 5. The points were fitted to an exponential function

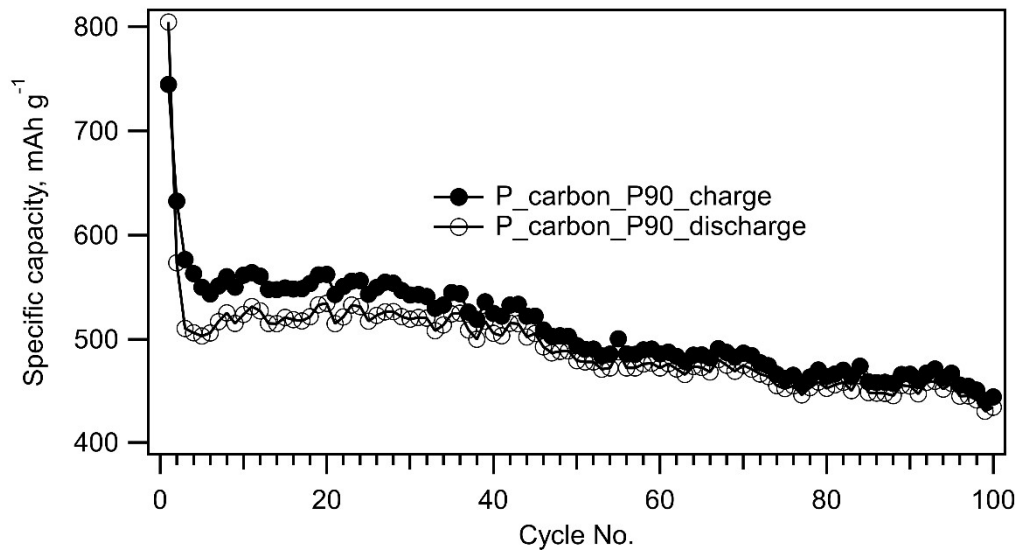

Figure S3 Galvanostatic chronopotentiometry at 0.1 C measured on the coin cell with P\_carbon\_P90 sulfur composite cathode
